# Supplementary material for: Transcription factor SP1-Mediated Upregulation of B-Myb Promotes Glioma Aggression Through Transcriptomic Mechanism
Source: Research Square preprint supplement (doi:10.21203/rs.3.rs-7699276/v1), 2025-10-08
Supplement: Supplementary file 1 [file ebf254a2a806ddc4907a7bff.docx]

**Materials methods**

**Patient with glioma cohort**

A total of 325 patients were enrolled in this study, all of whom were pathologically diagnosed with glioma. The clinicopathological information and RNA expression data were downloaded from the Chinese Glioma Genome Atlas (CGGA, http://www.cgga.org.cn/). All datasets were subjected to a standardized data preprocessing.

**Plasmid Transfection Plasmids**

The 2 ml (2.0 x 105 cells) of complete medium without antibiotics was added to each well of the 6-well plate, and cells were transfected by Lipofectamine 2000 reagent (Invitrogen) when the confluence reached 60%. The 200 ng plasmid and 2.5 μl was added to 60 μl Opti-MEM medium, respectively. The two solutions were incubated at room temperature for 10 min. Then, the plasmid was added to the lipofectamine solution and the mixture was incubated at room temperature for 15 min, followed by addition of 480 μL serum free medium. The cells were washed with PBS and then transfection mixture was added. After 6 h transfection, the medium was changed to normal medium. Stable transfection of lentivirus was performed according to the manufacturer’s instructions. The transfected cells were screened for corresponding antibiotic drugs for 2 cycles.

Table S1. List of primers used in this study.

| **Gene** | **Primer** | **Sequence (5' to 3')** |
| --- | --- | --- |
| GAPDH | forward | CTCTTCCTTCCTTCCTTCCTTCCT |
| GAPDH | reverse | AGCACTGTGTTGGCGTACAG |
| B-Myb | forward | CTTGAGCGAGTCCAAAGACTG |
| B-Myb | reverse | AGTTGGTCAGAAGACTTCCCT |

Table S2. Clinicopathological characteristics of patients.

| **Characteristics** | **Category** | **Number of cases** | **(%)** |
| --- | --- | --- | --- |
| **Age(years)** | <60 | 292 | 89.8 |
|  | ≥60 | 33 | 10.2 |
| **Sex** | Male | 203 | 62.5 |
|  | Female | 122 | 37.5 |
| **WHO grade** | WHOII | 103 | 31.7 |
|  | WHOIII | 79 | 24.3 |
|  | WHOIV | 139 | 42.8 |
|  | NA | 4 | 1.2 |
| **Histopathology** | O | 52 | 16.0 |
|  | A | 56 | 17.2 |
|  | AO | 12 | 3.7 |
|  | AA | 62 | 19.1 |
|  | GBM | 139 | 42.8 |
|  | NA | 4 | 1.2 |
| **IDH** | Mutant | 175 | 53.8 |
|  | Wildtype | 149 | 45.8 |
|  | NA | 1 | 0.3 |
| **1p/19q** | Codel | 67 | 20.6 |
|  | Non-codel | 250 | 76.9 |
|  | NA | 8 | 2.5 |
| **MGMT promoter methylation** | Yes | 157 | 48.3 |
|  | No | 149 | 45.8 |
|  | NA | 19 | 5.8 |
| **Radiotherapy** | Yes | 244 | 75.1 |
|  | No | 66 | 20.3 |
|  | NA | 15 | 4.6 |
| **Chemotherapy** | Yes | 193 | 59.4 |
|  | No | 111 | 34.2 |
|  | NA | 21 | 6.5 |
| **Recurrence** | Yes | 62 | 19.1 |
|  | No | 259 | 79.7 |
|  | NA | 4 | 1.2 |

NA, not appliable; A, astrocytoma; AA, anaplastic astrocytoma; AO, anaplastic oligodendroglioma; GBM, glioblastoma; O, oligodendroglioma.
